# Supplementary material
Source: PubMed Central journal article supplement (PMC4538936)
Supplement: NIHMS430277-supplement-supplement_1.pdf [file NIHMS430277-supplement-supplement_1.pdf]

**The table of contents entry** We have developed a dendrimer-based capture strategy for improved biomarker detection, and have validated it by using it as a solid phase for an ELISA assay for interleukin-6 and IL-1 $\beta$  in human serum. The dendrimer modified plate provided assays with enhanced sensitivity, specificity, and reproducibility, with an interleukin-6 detection limit of 0.13 pg ml<sup>-1</sup>. This improved capture approach could be expanded for the detection of a wide range of biomarkers.

Keyword (biosensors, dendrimers, antibody conjugation, cytokine, Interleukin-6, IL-1 $\beta$ )

Hye Jung Han, Rangaramanujam M. Kannan\*, Sunxi Wang, Guangzhao Mao, Juan Pedro Kusanovic, and Roberto Romero

**Multifunctional Dendrimer-templated Antibody Presentation on Biosensor Surfaces for Improved Biomarker Detection**

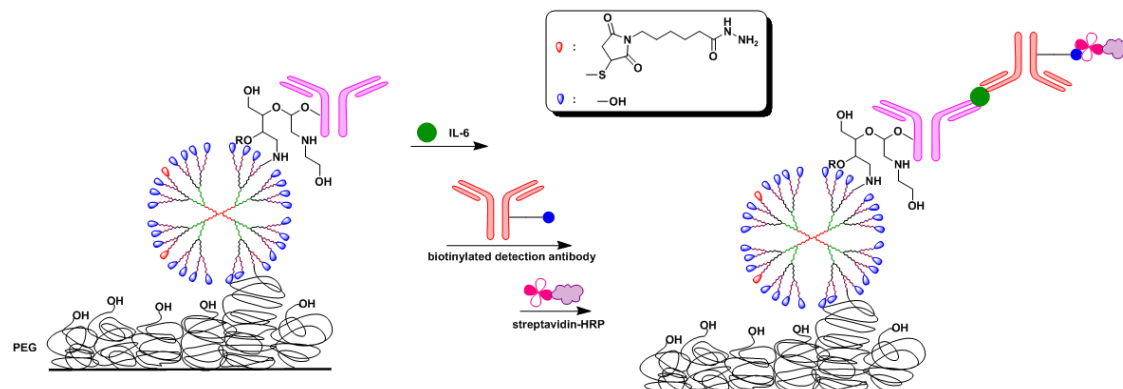

Column Title: *Hye Jung Han et al./Dendrimer-based Diagnostic Nanodevice*

***Supporting Information***

**HPLC Characterization** The purity of the conjugate was characterized by RP-HPLC. HPLC characterization was carried out with Waters HPLC instrument equipped with dual pump, an autosampler and dual UV detector interfaced to Breeze software. Symmetry300 C5 RP-HPLC column was used for characterization of the conjugate. The mobile phase used was acetonitrile/water (0.14% TFA) and gradient method used for analysis was (100:0)

(water:acetonitrile) to (50:50) in 40 min. The flow rate used was 1 ml min<sup>-1</sup> and HPLC chromatogram was monitored at 210 nm.

**Synthesis of hydroxyl/EMCH functionalized G4 PAMAM dendrimer 5** 2.2 mg of dendrimer conjugate **3** (98 nmole) was dissolved in 1ml of PBS/EDTA buffer (pH 7.4, 1mmole EDTA). To this solution, 0.84 mg of TCEP (2.94 μmole, 30 equiv.) was added. The reaction mixture was evacuated, flushed with N<sub>2</sub> and the reaction mixture was stirred at room temperature under N<sub>2</sub> until all the conjugate **3** was dissolved and converted to free thiolated conjugate **4**. The reaction mixture was cool down to 4°C and 0.99 mg of EMCH (2.94 μmole, 30 equiv.) in 1 ml of PBS buffer was added. The reaction mixture was reacted for 3 hrs at 4 °C under N<sub>2</sub>. 5 μl of 2-mercaptoethanol was added and reacted for 1 hr. The reaction mixture was dialyzed against D.I. water and lyophilized to give conjugate **5** as a pale yellow oily solid.

<sup>1</sup>H NMR (400 MHz, DMSO-*d*<sub>6</sub>) δ 8.95 (s, 1H, hydrazide amide NH), 8.03 (bs, amide NHs), 7.92 (bs, amide NHs), 7.82-7.72 (bs, amide NHs) 7.55 and 7.43 (bs, bs, 2.9H, CH<sub>2</sub>NHC(S)NHCH<sub>2</sub>), 3.95 (dd, SCH(C=O)CH<sub>2</sub>, dd, *J* = 12 and 4.8 Hz ), 3.36 (m), 3.15 and 3.05 (bs, bs), 2.63 (bs, 11.3H), 2.41 (bs), 2.18(bs, 11.4H), 2.01(bt, 3.7H), 1.46-1.32 (m, 16.8 H), 1.18 (m, 9.87H) ppm. MALDI-TOF (pos) *m/z* 26325

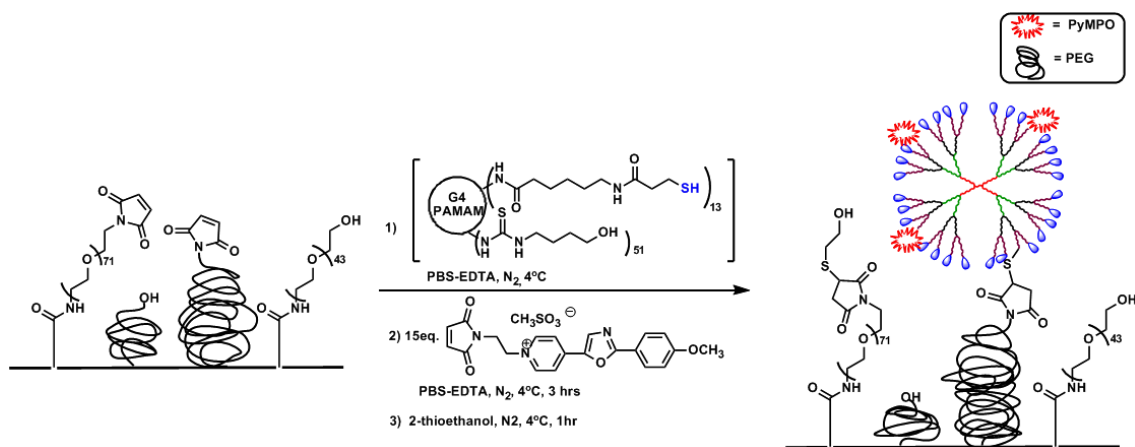

**Scheme S1.** Schematic representation of immobilization thiol/hydroxyl G4-PAMAM **4** and PyMPO onto ELISA plate.

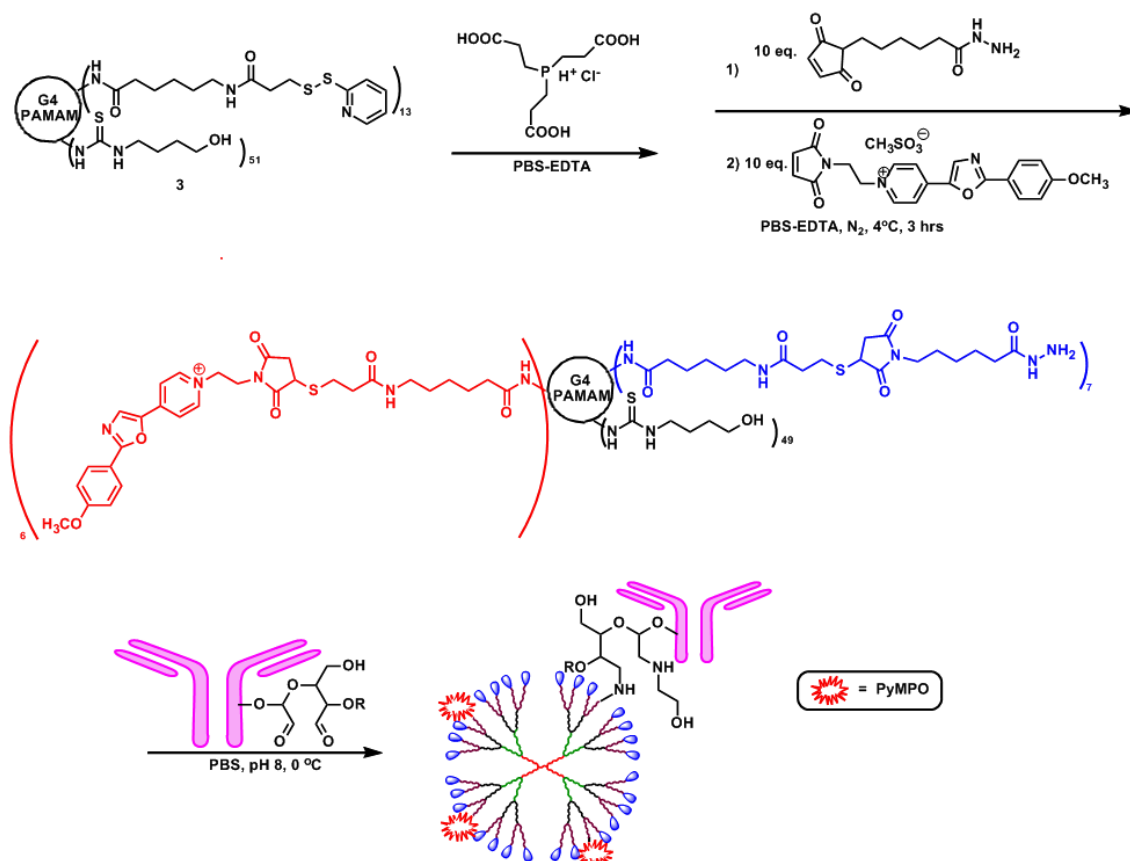

**Scheme S2.** Schematic representation of conjugation reaction of hydrazide/PyMPO functionalized dendrimer **6** with oxidized antibody.

**Synthesis of PyMPO/EMCH functionalized G4 PAMAM dendrimer 6** 22 mg of dendrimer conjugate **3** (980 nmole) was dissolved in 3 ml of PBS/EDTA buffer (pH 7.4, 1mmole EDTA). To this solution, 8.4 mg of TCEP (29.4  $\mu$ mole, 30 equiv.) was added. The reaction mixture was evacuated, flushed with N<sub>2</sub> and the reaction mixture was stirred at room temperature under N<sub>2</sub> until all the conjugate **3** was dissolved and converted to free thiolated conjugate **4**. The reaction mixture was cool down to 4 °C and 3.3 mg of EMCH (9.8  $\mu$ mole, 10 equiv.) in 1 ml of PBS buffer and 4.6 mg of PyMPO (9.8  $\mu$ mole, 10 equiv.) in 2 ml of ethanol were added. The reaction mixture was reacted for 3 hrs at 4 °C under N<sub>2</sub>. 10  $\mu$ l of 2-mercaptoethanol was added and reacted for 1 hr. The reaction mixture was dialyzed against D.I. water in the dark and lyophilized to give conjugate **6** as a orange-yellow oily solid.

$^1\text{H}$  NMR (400 MHz,  $\text{DMSO-}d_6$ )  $\delta$  9.21 (bs, 2H, PyMPO pyridine ring H  $\alpha$  to N), 8.95 (bs, 1H, hydrazide amide NH), 8.61 (bs, 2H, PyMPO pyridine ring H), 8.03 (bs, bs, amide NHs and PyMPO benzene ring H), 7.92 (bs, amide NHs), 7.82-7.72 (bs, amide NHs) 7.55 and 7.43 (bs, bs, 2.9H,  $\text{CH}_2\text{NHC(S)NHCH}_2$ ), 7.10 (bs, 2H, pyMPO benzene ring H), 4.05 and 3.95 (dd, dd,  $\text{SCH(C=O)CH}_2$ , 2H), 3.92 (s, 3H,  $\text{OCH}_3$ ), 3.36 (m), 3.15 and 3.05 (bs, bs), 2.63 (bs, 11.3H), 2.41 (bs), 2.18(bs, 11.4H), 2.01(bt, 3.7H), 1.46-1.32 (m, 16.8 H), 1.18 (m, 9.87H) ppm.  
MALDI-TOF (pos)  $m/z$  26616.0

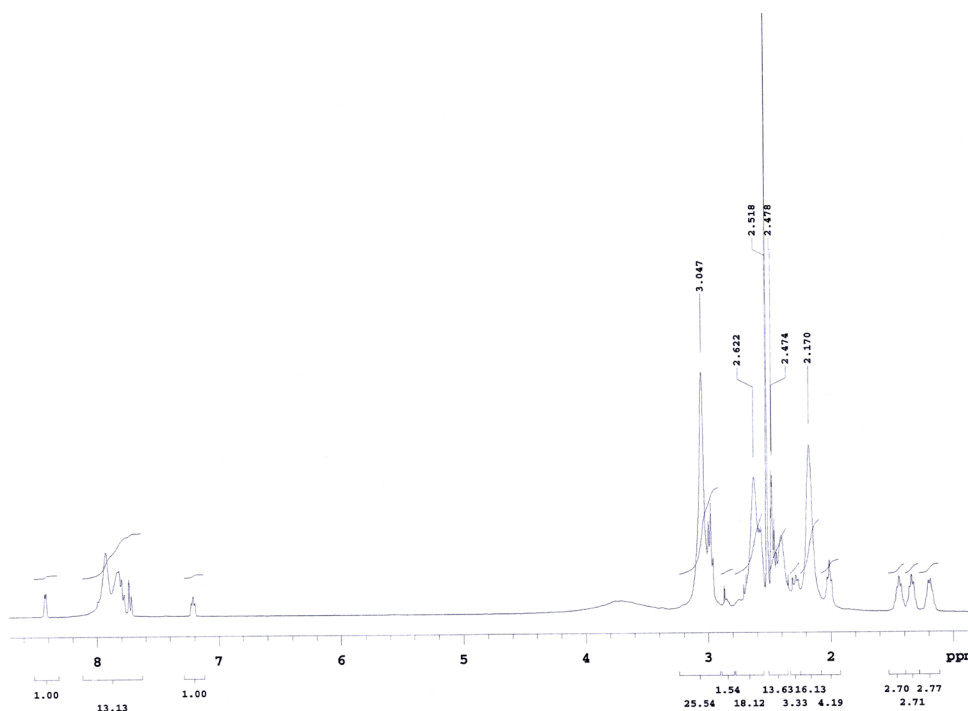

**Figure S1.**  $^1\text{H}$  NMR of PDP functionalized G4 PAMAM dendrimer 2.

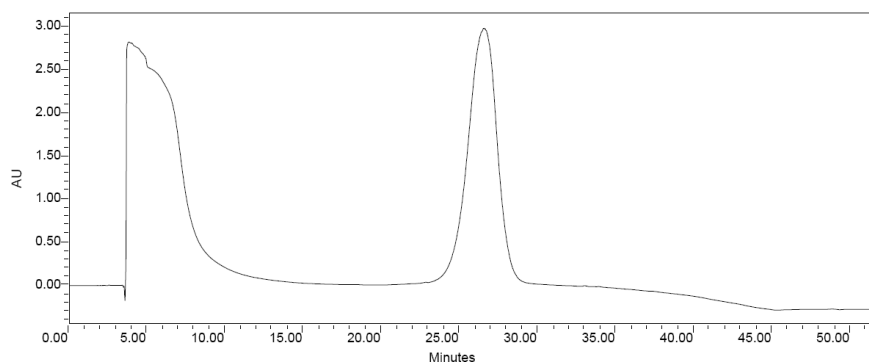

**Figure S2.** Elution profile of PDP functionalized G4 PAMAM dendrimer 2 monitored at 210 nm.

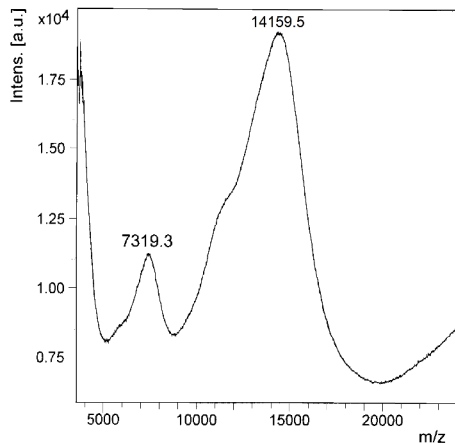

**Figure S3.** MALDI MS of G4-PAMAM-NH<sub>2</sub>.

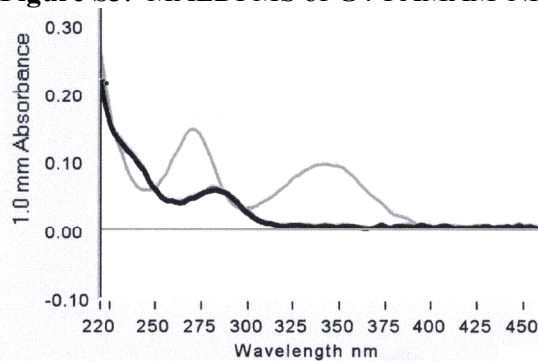

**Figure S4.** UV-Vis spectra of LC-PDP functionalized G4-PAMAM dendrimer **2** (black) and reduced **2** after addition of DTT (gray). UV-Vis spectra was taken using NanoDrop spectrophotometer ND-1000 (NanoDrop Technologies) and 1mm absorbance at 343 nm was multiplied by 10 in order to convert 1cm absorbance.

$$\frac{\Delta A}{8080} \times \frac{\text{Mw of Conjugate}}{\text{mg/ml of Conjugate}} = \text{Moles of PDP per Moles of Conjugate}$$

$$\frac{0.98}{8080} \times \frac{18545}{1\text{mg}/6\text{ml}} = 13$$

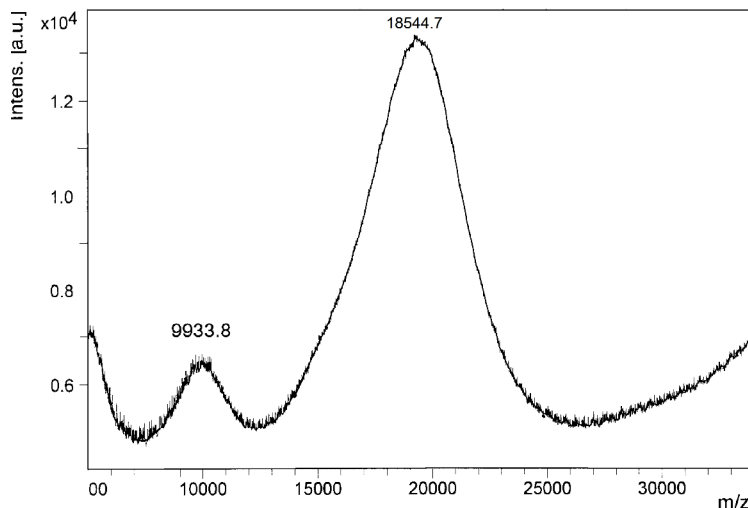

**Figure S5.** MALDI MS of LC-PDP functionalized G4-PAMAM dendrimer **2**.

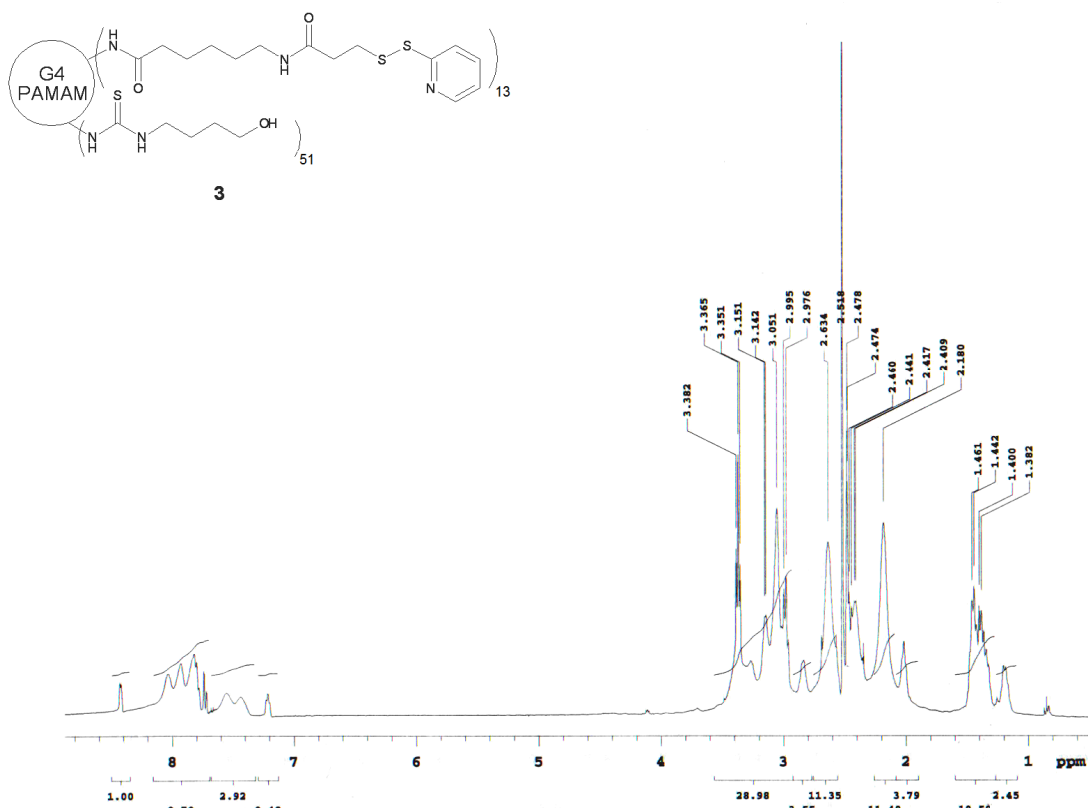

**Figure S6.** <sup>1</sup>H NMR of hydroxyl/PDP functionalized G4-PAMAM dendrimer **3**.

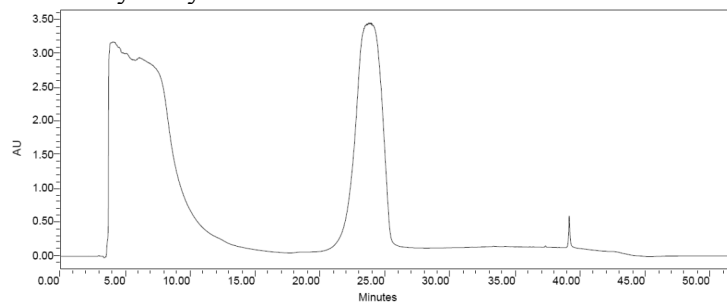

**Figure S7.** HPLC elution profile of hydroxyl/PDP functionalized G4-PAMAM dendrimer **3** monitored at 210 nm.

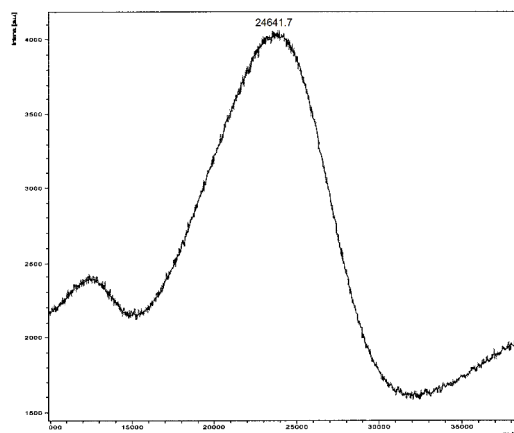

**Figure S8.** MALDI MS of hydroxyl/PDP functionalized G4-PAMAM dendrimer **3**.

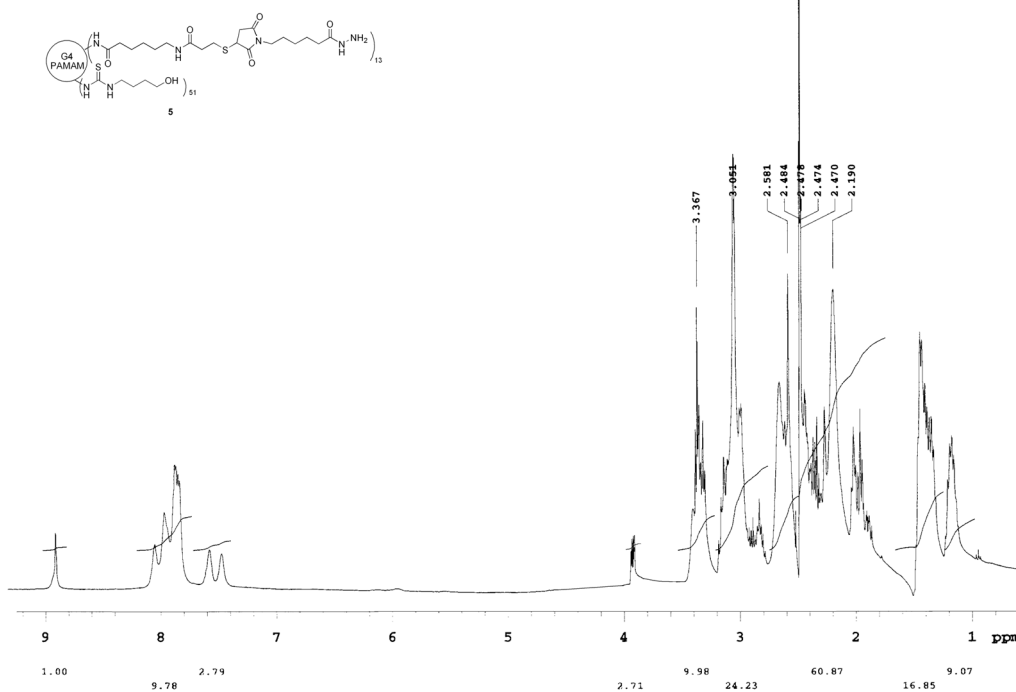

**Figure S9.**  $^1\text{H NMR}$  of hydroxyl/EMCH functionalized G4 PAMAM dendrimer **5**.

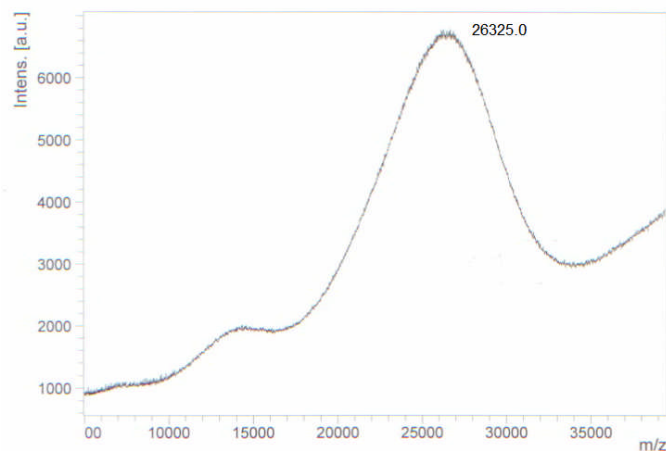

**Figure S10.** MALDI MS of hydroxyl/EMCH functionalized G4 PAMAM dendrimer **5**.

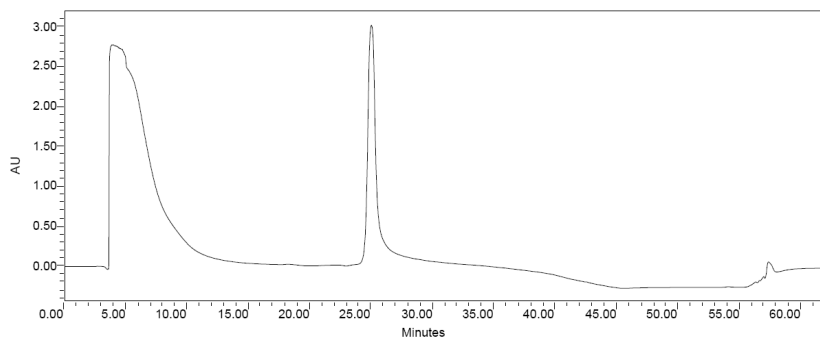

**Figure S11.** HPLC elution profile of hydroxyl/EMCH functionalized G4 PAMAM dendrimer **5**.

### Graft Density

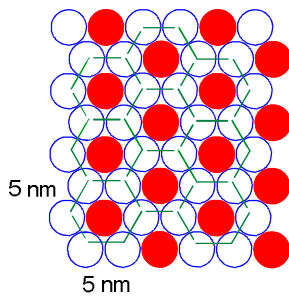

one dendrimer (and antibody) per  $65 \text{ nm}^2$

● diameter of dendrimer  $\sim 5 \text{ nm}$   
IL-6  $\sim 21 \text{ kDa} \sim 5 \text{ nm}$  diameter

⬡ area of unit cell =  $(3\sqrt{3}/2) 5 \text{ nm}^2 = 65 \text{ nm}^2$

○ PEG

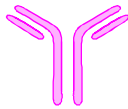

Ab IgG:  $14.5 \text{ nm}$  long x  $8.5 \text{ nm}$  wide x  $4 \text{ nm}$  thick  
minimal packing area  $34 \text{ nm}^2$   
maximal packing area  $123 \text{ nm}^2$

Figure S12. Grafting density of Mal-PEG-NH<sub>2</sub> (dendrimer/antibody).

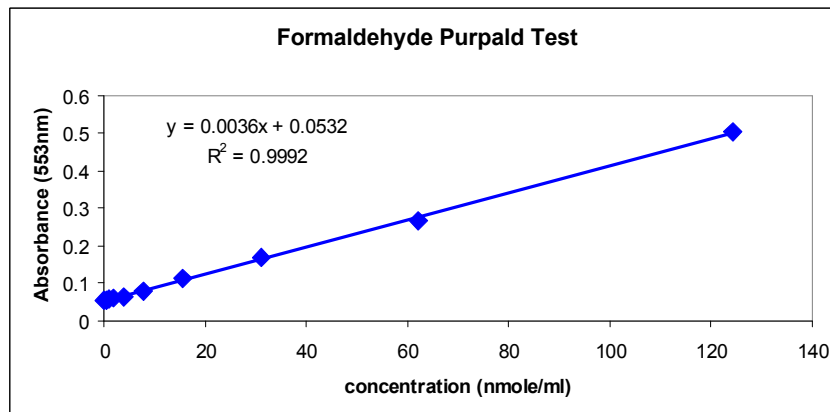

Figure S13. Standard curve of formaldehyde purpald test.

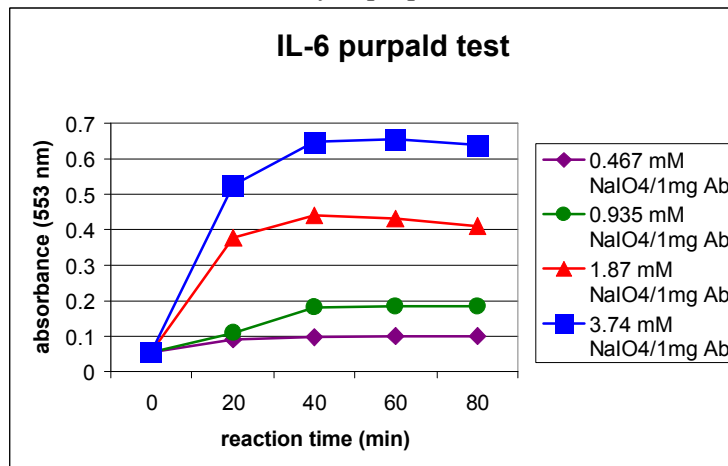

Figure S14. Anti-human IL-6 antibody purpald test.



Submitted to

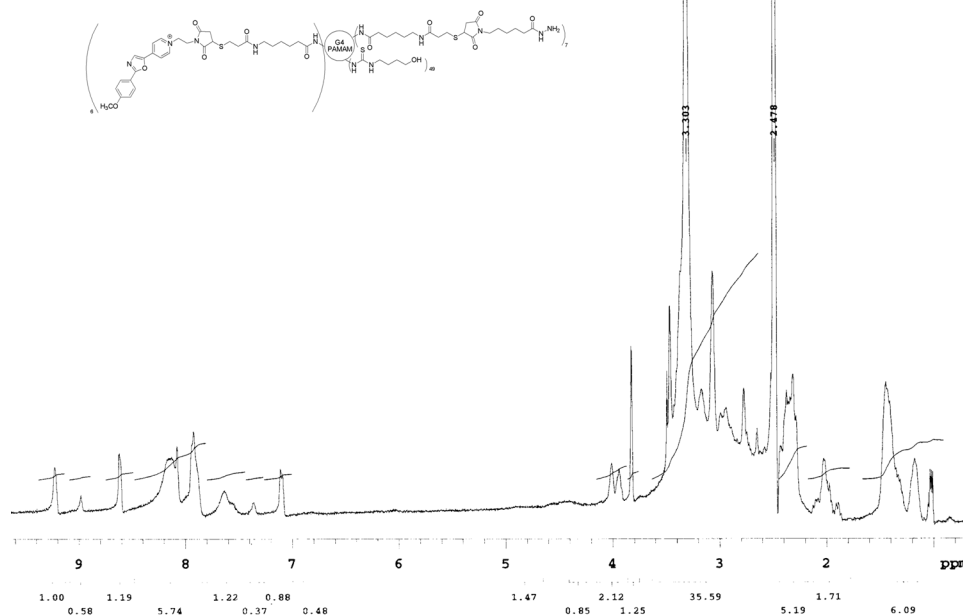

**Figure S15.**  $^1\text{H}$  NMR spectra of PyMPO/EMCH functionalized G4 PAMAM dendrimer **6**.

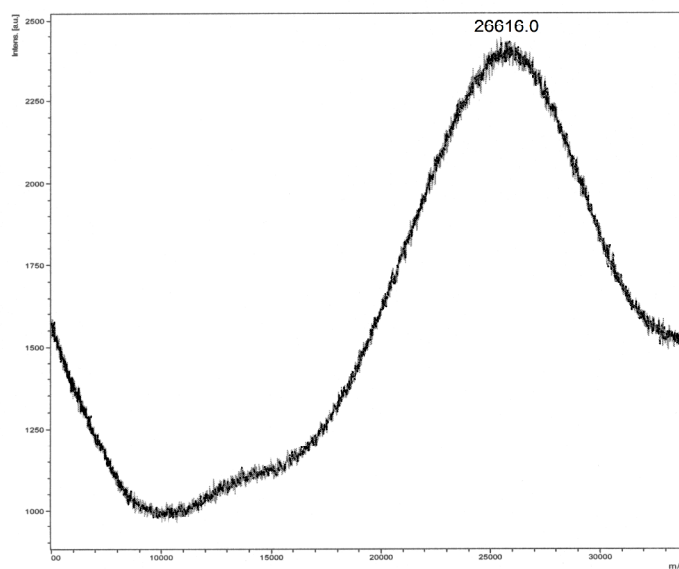

**Figure S16.** MALDI-MS of PyMPO/EMCH functionalized G4 PAMAM dendrimer **6**.
